# Supplementary material for: Predicting and reducing wind energy field experiment uncertainties with low-fidelity simulations
Source: Copernicus journal article supplement (doi:10.5194/wes-2023-130), 2023-10-17
Supplement: Supplementary file [file wes-2023-130-AC1-supplement.pdf]

Reviewers,

Thank you for your thorough and thoughtful reviews and excellent suggestions. Below you will find point by point responses to each of your comments including what or where changes to the manuscript were made in response. Your suggestions have significantly improved the manuscript specifically by making the assumptions, strengths, and limitations much clearer. We believe we have addressed all of your comments (though we recognize there will always be points within uncertainty warranting further research

*Discussion of:*

## **Predicting and reducing wind energy field experiment uncertainties with low-fidelity simulations**

09 December 2023

The paper presents a virtual experiment-based methodology for estimating the amount of uncertainty in wind turbine load and power performance measurements, subsequently providing possibilities to estimate how long a measurement campaign will need to be in order to achieve a certain level of confidence in the results.

While I definitely encourage the general idea of the authors to consider “how long measurements are long enough” and I find this to be a very relevant question, I believe they make several assumptions that may not be valid in some circumstances. This may question the robustness and generality of their methodologies, and I therefore recommend that these assumptions are discussed in much more detail and corrected wherever necessary. Below, additional explanations are given in the General Comments section, as well as some additional recommendations for further improvement.

We appreciate this point. The generality was (unintentionally) overstated. We have taken effort to be more precise in our language and have addressed each specific comment as described below.

### **General comments**

1) The authors assume that the random errors are aleatoric, and completely independent. I am not certain this is the case, for example one could assume that the random error in two anemometers of the same type and on the same site may have correlation with external factors like the wind speed and turbulence. Then the random errors will be correlated to each other through the correlation to external factors. Such correlation may reduce the total variance of the difference between the errors. This issue can however be partially taken into account if the uncertainty is evaluated bin-wise as the authors are doing.

Thank you for this point; it is well taken. We wrote the manuscript without clearly stating our assumption that error sources are independent. We have now updated it in several places to clarify what changes would be necessary to accommodate correlated error sources and to state when we are assuming uncorrelated errors in our analyses (see for example lines 45 and 54).

2) It is not a given that a numerical model will be able to simulate all the random variability present in real experiments. As the actual wind field in an experiment is never fully observable, we are not necessarily able to represent the entire variability in the wind conditions in the simulations, because the simulations will only vary a limited number of parameters, and the simulated wind fields will match the target statistics of the entire wind field, while the measurements are taken at a single point or a few points only. As a result, it is very often that one-to-one numerical load simulations will have smaller variance (after subtracting the bias and conditional means) than the actual measurements.

This is a good point and we have added details in regard to this in section 2.2.

3) Power performance and load validation are addressed in the IEC 61400-12 and -13 standards respectively. Uncertainty is discussed in both standards. Any real load or power performance validation

campaign would be expected to comply with the provisions of these standards. It is therefore important to align the discussions of this paper with the standards and outline any differences.

We have added a comment at the end of the section 2 and the beginning of 3.2 that acknowledges that there are standards that could be relevant to wind energy experiments and that, while the method detailed in the manuscript is not laid out to be explicitly in line with them, it is entirely adaptable to comply with them.

### **Specific comments**

4) Page 2, line 26: I am not certain about the strict classification of bias as epistemic and the random errors as aleatoric. There may be epistemic errors that have non-zero variance (aliasing and other numerical artefacts being an example), while aleatory effects may also be autocorrelated or related to an external factor which will introduce bias for a finite experiment.

It seems to us that the words bias, epistemic, and “Type B” as one set and random, aleatoric, and “Type A” as another set are often used interchangeably and that it is often acceptable to do so. To clarify our meaning, we have edited the text to refer only to “bias” and “random” errors such that the proceeding text is a definition of those terms as we will use them. To further address your point about how they may be combined, we have added a clarification to say that “When they can be entirely separated...”.

5) Equation (2): I believe this equation is true for the case when  $\delta_{P1}$  and  $\delta_{P2}$  are completely uncorrelated. This however may not be the case, for example if the error is dependent on an external parameter (say, wind speed), then  $\delta_{P1}$  and  $\delta_{P2}$  will be positively correlated and the total variance will be less than the root mean square sum that the authors suggest.

This is a good point and we have added a clarification regarding the possible correlation of uncertainties. Any correlation would, as you say, reduce the uncertainty of the difference relative to uncorrelated individual uncertainties.

6) Page 10: the authors say “day-to-day variations should be much smaller than hour-to-hour variations”. It depends – the weather systems passing over a location typically have duration in the range of 1-3 days, so there could be significant day-to-day variations. On the other hand, this may not be very important as we should not expect that “calendar days” should have influence on the external conditions, it will more likely be dependent on season and time of day.

This is a good point and we have edited the text to say, “though day-to-day variations are likely less important than seasonal changes over weeks and months.”

7) As mentioned earlier, I expect that the variability produced in simulations may be smaller than what we see in real measurements, mainly because of the incomplete characterization of the true wind field passing through the rotor. I think this expectation is confirmed by the results shown in Figure 5, where there is only limited dispersion in the data.

We believe the details added in section 2.2 also address this point in such a way as to make the reader aware of the trade-offs and possible solutions.

## Review of “Predicting and reducing wind energy field experiment uncertainties with low-fidelity simulations” by Houck et al.

### **Overall assessment**

This is a useful contribution to the often-overlooked discipline of designing experiments, here with particular relation to field testing in wind energy. The paper outlines a methodology for determining the testing duration necessary in order to obtain significant and converged results in a testing situation where a simultaneous control can be performed. This control is often possible but maybe just as often, impossible. My initial reaction was that the authors had rather neglected this latter case, giving the impression that bias uncertainties can easily be disregarded in most wind energy field experiments.

This is of course not the case. A large field experiment to examine and quantify wind farm global blockage has just been completed and here both the random and bias uncertainties are significant and both play a crucial role in determining whether a meaningful outcome of the experiment is possible.

On re-reading, maybe my initial reaction was rather harsh. In any case, I have several suggestions in the detailed comments below, to create in my view a more balanced view regarding random and bias uncertainties.

My other main comment is that the case study section is especially lengthy with a lot of detail. I am not convinced that all the detail is justified and would ask the authors to reflect on whether some simplification and shortening could be possible, for example, reducing the number of rotor size cases and possibly taking fewer QoIs. This would maybe help to highlight the several important points that the case study illuminates.

We appreciate this suggestion, but also feel that the differences in results specific to each QoI help to highlight details that the reader may not otherwise consider. For example, the way in which the results for each rotor cross each other in the edge root bending moment at wind speeds just above peak loading. These details help demonstrate the utility of the method at shining a light on specific combinations of conditions and quantities that may be especially difficult to measure.

We also added in a brief justification (~line 222) for the choice of 5 modified rotor sizes. This was to understand if would it be tremendously easier (require much less duration) to measure a 3% power gain than, say, a 1.5% power gain, for example. In the future experiment that motivated our idea for this method (the AMSIT experiment discussed in section 3.5), we need to balance an increase in power with increases in the blade loads. We wondered, if we can't run the experiment long enough to measure a difference in power, is there another QoI that would be much faster to converge. In evaluating these QoIs, we found that there are subtleties to measuring each of them, so we have shown them all for completeness. We expect that many researchers find themselves in similar dilemmas of optimizing their experiments and hope that this better justifies the length of the case study and increases its relevance.

## **Detailed comments**

### **Title**

I don't think the title quite matches the paper core topic – determining the testing duration required when random uncertainties dominate. Maybe reconsider this?

We agree. We have retitled the paper to “Method to predict the minimum measurement and experiment durations needed to achieve converged and significant results in a wind energy field experiment”.

### **Abstract**

L3 replace “commonly” by “sometimes” or re-word to something like “some field experiments can be conducted with a control and treatment”

Agreed and done.

### **Introduction**

L24 drop the “are still of great value” ?

Agreed and done.

L33 maybe add “especially where control and treatment are carried out essentially simultaneously” before “it is often safe” (or something like this..). My concern here is that if bias errors depend critically on the conditions, in a non-simultaneous control and treatment, the bias uncertainty may still be very relevant.

We have included your suggestion and also clarified that binning of data by atmospheric conditions should help for non-simultaneous measurements. We have also made similar edits in other places in the manuscript where this comes up.

L45 Probably just me but the sentence “Represented as error bars,... within the uncertainty interval.” took me a long time to understand. Maybe re-word to something like “To demonstrate a significant difference, the error bars derived from the best estimate and the uncertainty at the selected confidence level, should not contain zero.”

We have reworded this for clarity.

L60 “Like significance, convergence is also ensured by increasing the number of samples..” – Is significance always ensured – what if there really is no difference?

We see how this is confusing. If there is no difference, zero will always fall within the interval represented by the errorbars. As more samples are added, the interval will shrink, but there will continue to be no difference and this wouldn't be referred to as a significant non-difference. We have amended this to say, “Convergence is ensured by increasing the number of samples...”

## 2.1 Simulation Method

L96 The simulation must have “acceptable accuracy” – what is this accuracy? How does this relate to the “low-fidelity” of the paper title? I think this requires a little more attention.

We have added this statement: “This requires expert judgement to ensure the model fidelity does not neglect effects critical to the measurement of interest. For example, if the three-dimensional flow around the blades is considered important to the QoI, then a Blade Element Momentum approach may not suffice.”

## 2.3 Analysis and uncertainty quantification

L166 “any bias errors should be calculated for each QoI..” – I understand this as bias *uncertainties* (if you know the errors you can just correct for them). Please be careful in your use of “error” and “uncertainty”. Could your methodology be extended to include this step – i.e. calculating an estimate of bias uncertainties based on the input (and output ?) of the simulations?

You are right! We were being too loose in our use of “error” and “uncertainty” and have revised this throughout the manuscript. Regarding L166, calculation of uncertainties due to bias errors should be straightforward if they are known, which is one reason we chose not to explicitly demonstrate how it would be done. To be most accurate, however, it may have to include biases introduced in modeling, which would be uncovered during a thorough validation of the turbine model, and such data are rarely available. We have added some text to better explain this subtlety at the end of section 2.3.

## 3.1 Tip Extensions

L210 “region 2” – people not familiar with wt control may not know what this means.

This has been edited to say (line 232), “...to ensure that it is operated optimally by finding the combination of blade pitch and tip speed ratio that maximizes  $\$C\_P\$$  in region 2 of the power curve. Region 2 is defined as the range of wind speeds where the turbine produces power but wind speeds are too low for it to reach rated power.”

## 3.2 Inflow creation for the base study

L251 “The shear exponent was then averaged for each 10-minute bin.” – why not just use the 10 minute means to calculate one alpha?

Given the temporal variability in the flow, I suspect that you get a “truer” average of the shear by calculating it for all profiles in time and then averaging. That said, you might get a better fit by using the average profile, as you suggest, because it ensures that any extreme or more difficult to fit profiles in time do not throw off the average. We have added text (~ line 275) to this point as it may be more appropriate for some data sets and clarifies that alternative choices can be made at various steps while still using the general method to predict the necessary durations.

L252 “It is not necessary to apply quality control to the time series” – Don’t understand this. Do you mean that the necessary QC can be performed using the 10 minute statistics?

We have clarified this (now at ~ line 277).

### **3.5 Discussion of the Case Study**

L453 sentence ending “, perhaps the addition of a few additional samples.” seem incomplete.

This sentence has been fixed.

L466 “suss out” is rather colloquial! Maybe use boring old “determine” instead .

Agreed and changed.
